# Supplementary material for: Human hair derived uPA loaded capsules with dual near-infrared (I and II biowindows) laser responsive capabilities for multi-effective thrombolysis therapy
Source: Royal Society of Chemistry journal article supplement (doi:10.1039/d0tb02242j), 2020-01-01
Supplement: d0tb02242j1.pdf [file d0tb02242j1.pdf]

Electronic Supplementary Material (ESI)

Supporting Information

**Human Hair Derived uPA Loaded Capsules with Dual Near-Infrared  
(I and II Biowindows) Laser Responsive Capabilities for Multi-  
Effective Thrombolysis Therapy**

Cuifu Fang,<sup>a,b</sup> Zhiwei Zhong,<sup>a</sup> Teng Zhang,<sup>a</sup> Shuang Jia,<sup>c</sup> Xingwei Ding,<sup>c</sup> Weimin Zhou<sup>\*a</sup> and Xiaolei Wang<sup>\*c,d</sup>

<sup>a</sup> Department of Vascular surgery, The Second Affiliated Hospital of Nanchang University, No.1 Minde Road, Nanchang, 330006, Jiangxi Province, China.

<sup>b</sup> The Third Ward of Department of General Surgery (Department of Vascular breast surgery), The First Affiliated Hospital of Gannan Medical University, Ganzhou, 341000, Jiangxi Province, China.

<sup>c</sup> National Engineering Research Center for Bioengineering Drugs and the Technologies, Institute of Translational Medicine, Nanchang University, Nanchang 330088, China.

<sup>d</sup> College of Chemistry, Nanchang University, Nanchang 330088, China.

Corresponding Authors: Weimin Zhou, [orcid.org/0000-0003-3086-6692](https://orcid.org/0000-0003-3086-6692); [drzwm@sina.com](mailto:drzwm@sina.com).

Xiaolei Wang, [orcid.org/0000-0003-3403-1174](https://orcid.org/0000-0003-3403-1174); Email: [wangxiaolei@ncu.edu.cn](mailto:wangxiaolei@ncu.edu.cn)

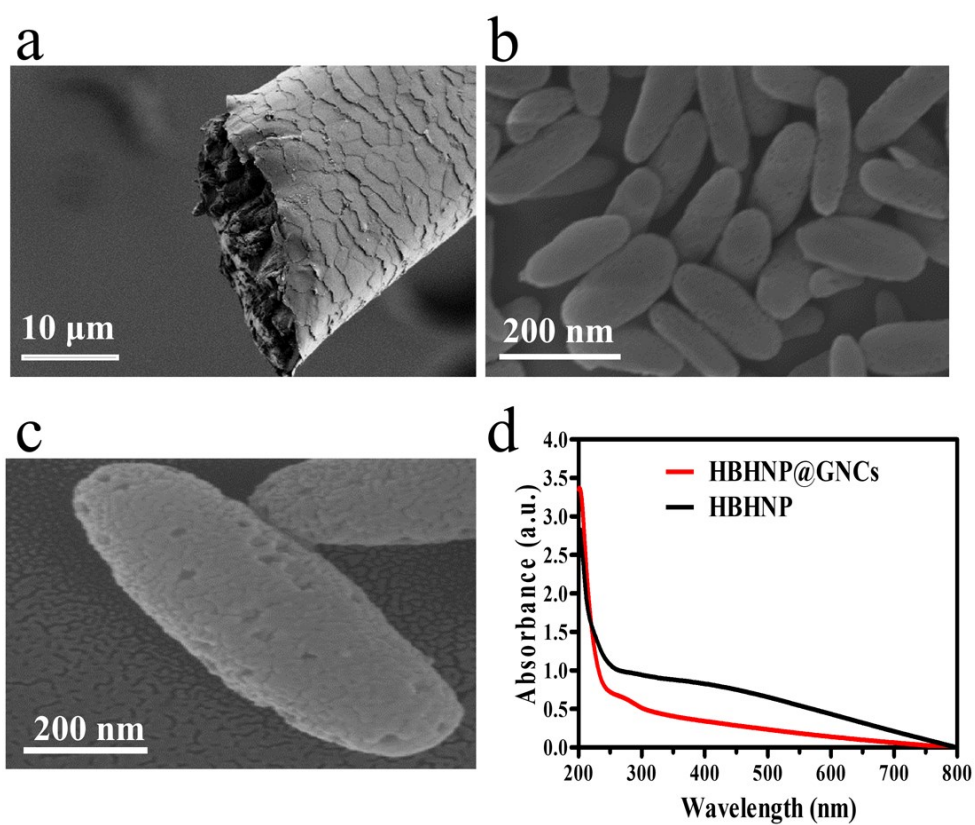

Figure S1. SEM images of Human black hair (a), HBHNP (b, c) and UV-vis spectrum of HBHNP and HBHNP@GNCs (d).

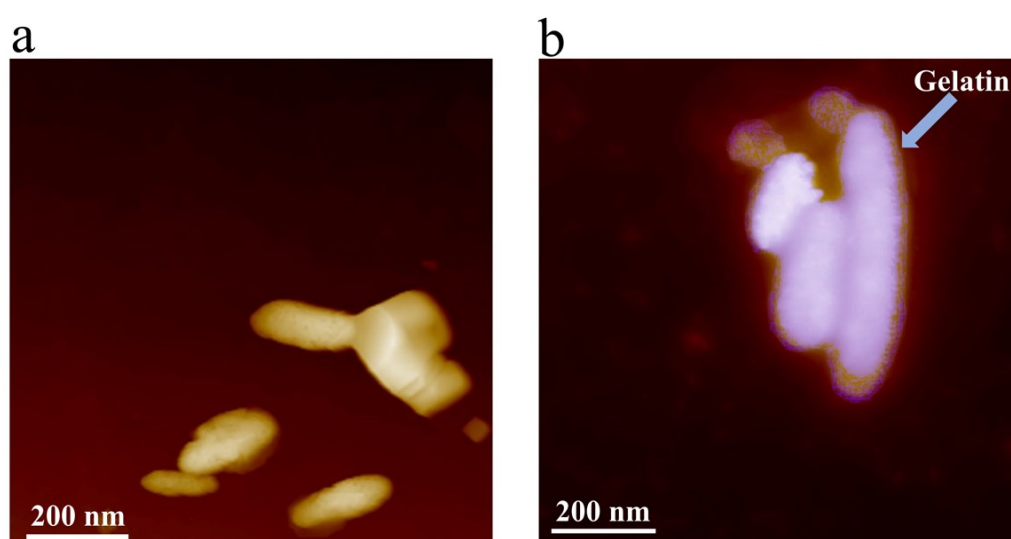

Figure S2. AFM images of HBHNP (a) and HBHNP@GNCs (b).

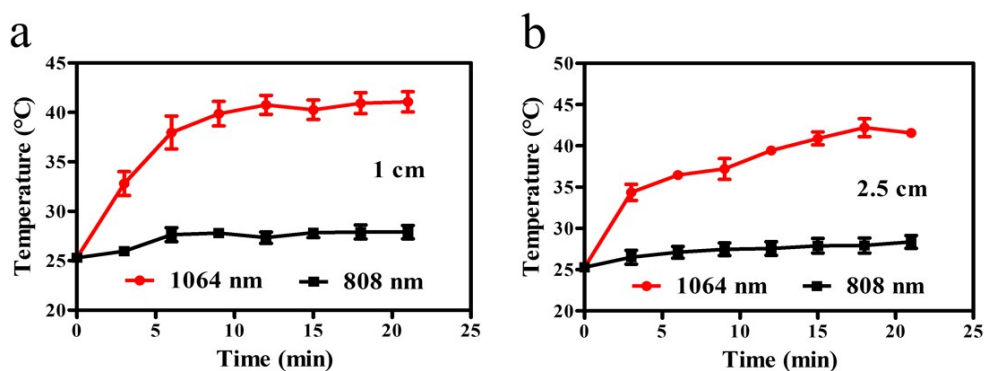

Figure S3. Comparison of temperature elevation curve of HBHNP@GNCs between 1064 nm and 808 nm NIR irradiation on 1 cm (a) and 2.5 cm (b) thick agar hydrogel clots. Error bars represent the standard deviation of three separate measurements.

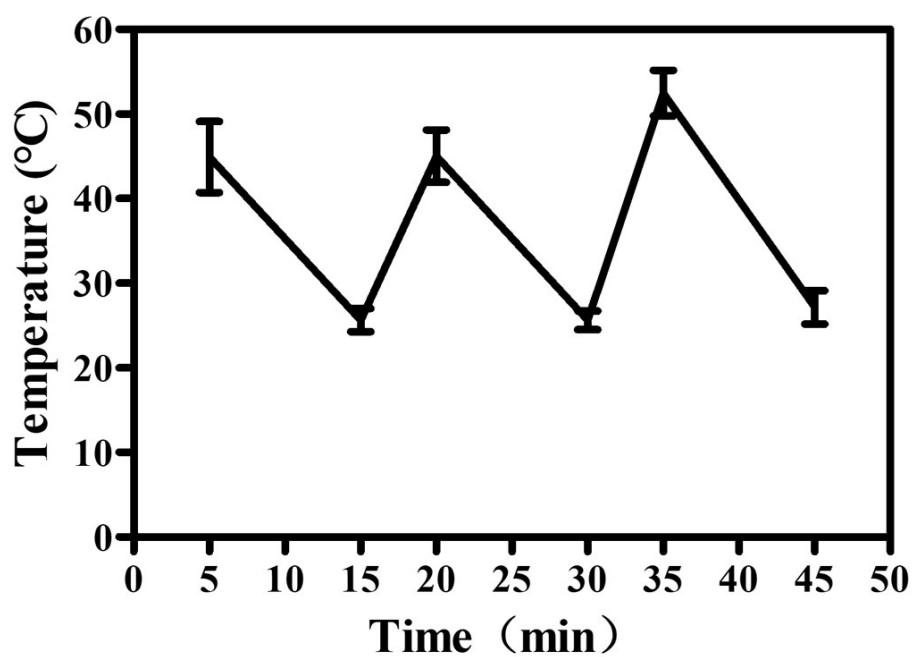

Figure S4. uPA@HBHNP@GNCs heating curve during *in vitro* thrombolysis under on and off NIR (808 nm, 2 W cm<sup>-2</sup>) irradiation.

a

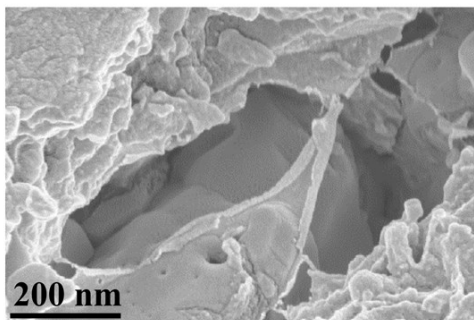

b

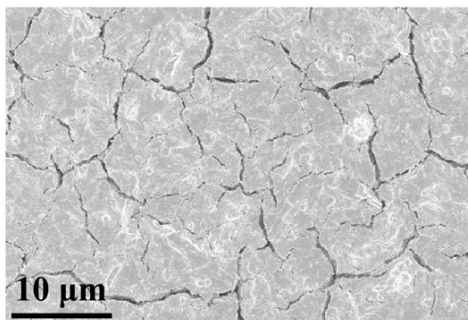

Figure S5. SEM images of thrombus after uPA@HBHNP@GNCs with NIR (808 nm, 2 W cm<sup>-2</sup>) irradiation thrombolysis *in vitro*.

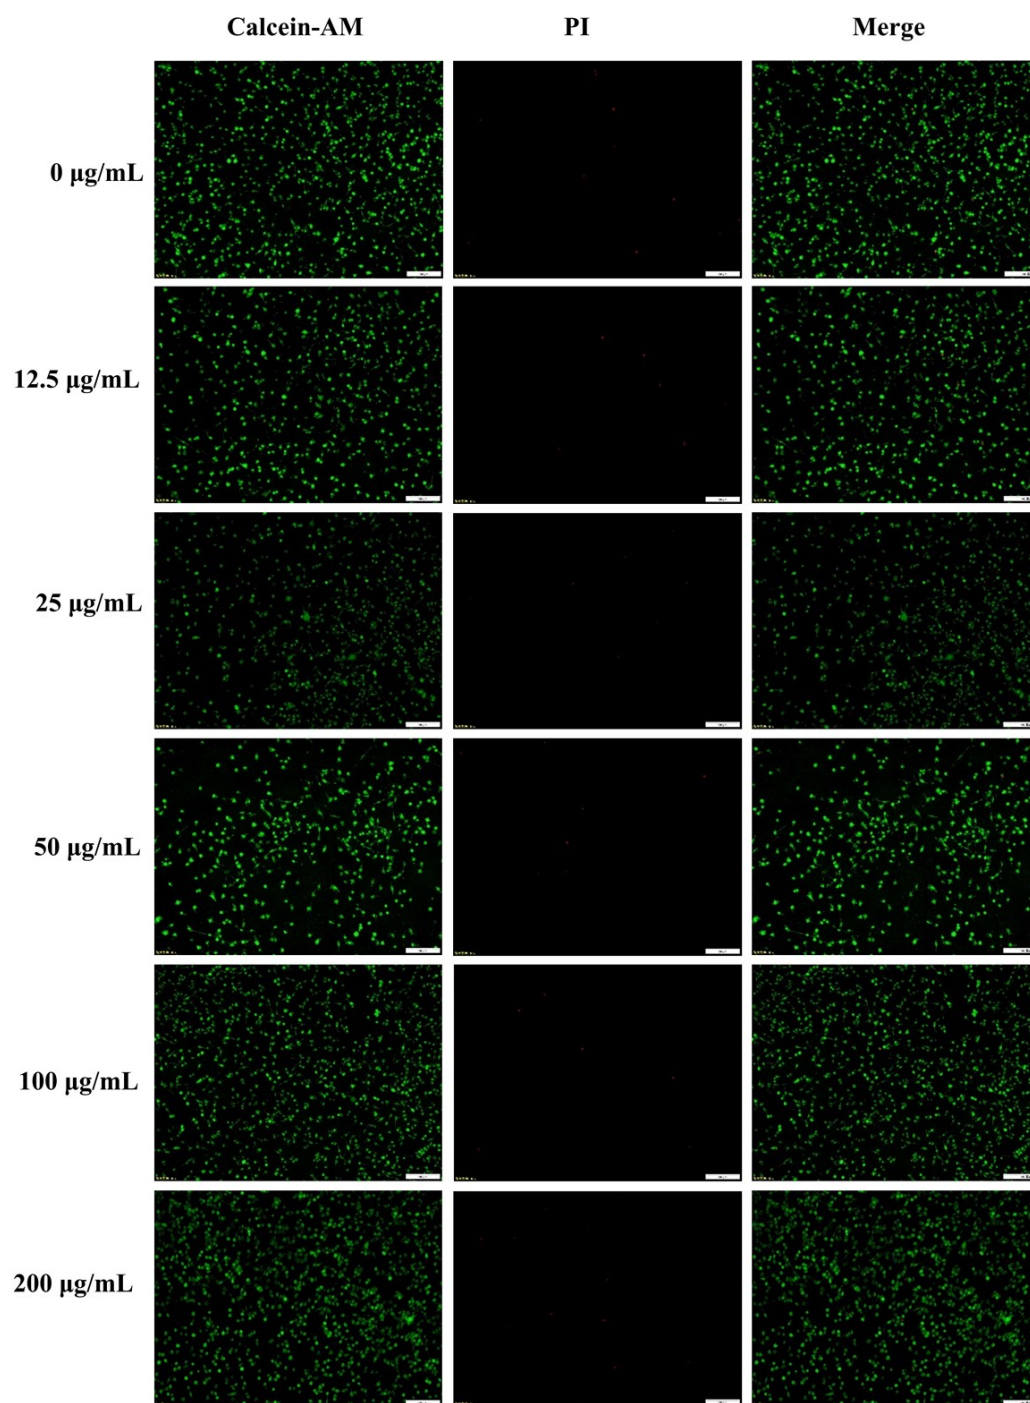

Figure S6. Live/dead cell assays of mouse fibroblast L929 cells treated with different concentrations of HBHNP@GNCs. The images were photographed using inverted fluorescence microscope (scale bar: 100  $\mu\text{m}$ ).

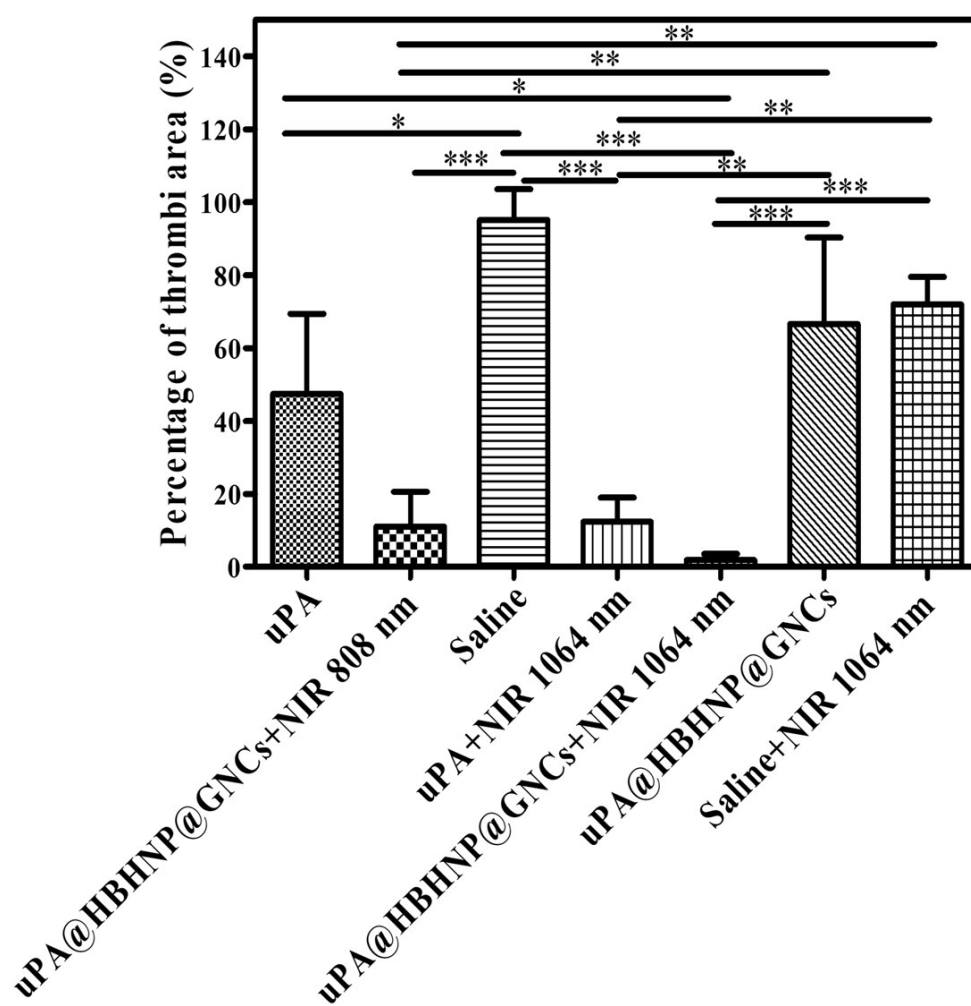

Figure S7. Percentage of thrombus area in blood vessel lumen area (%) after treatment for 24 h. \*  $p < 0.05$ , \*\*  $p < 0.01$ , \*\*\*  $p < 0.001$ .

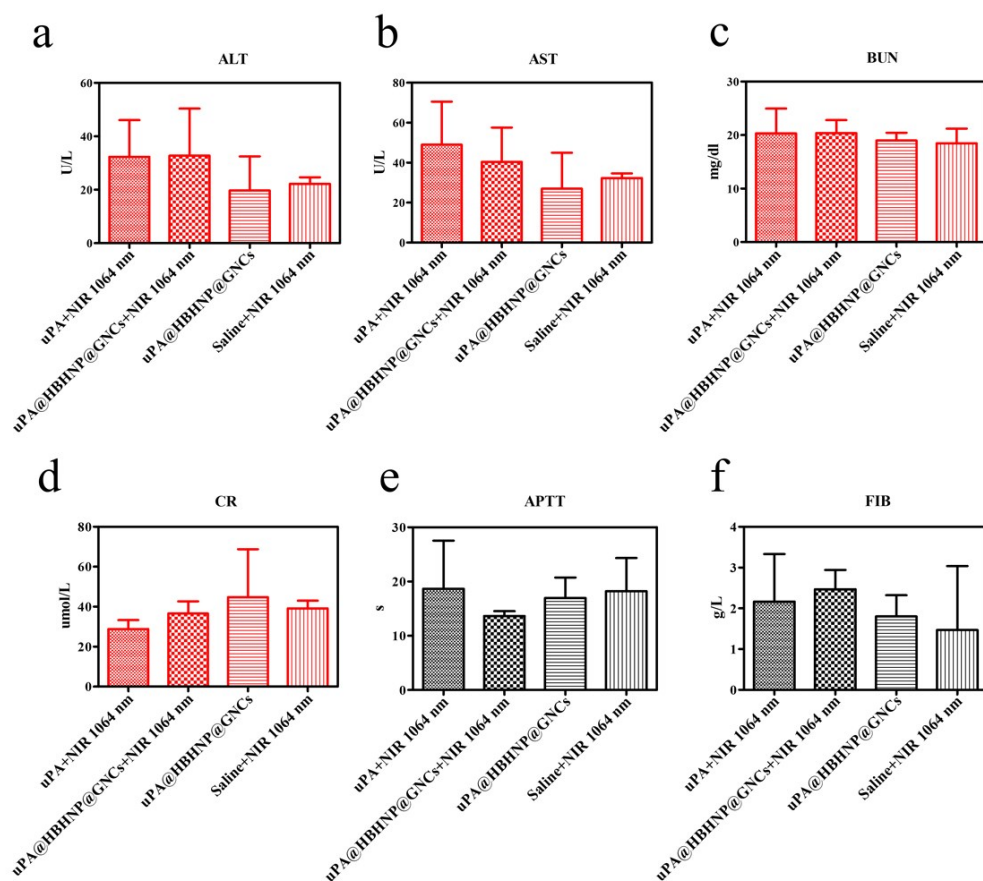

Figure S8. Biochemical test results of SD rats blood after 48 h of treatment.
